# Supplementary material for: One-pot synthesis of 1,3-oxazine derivatives catalyzed by a green nanocomposite of lacunary phosphomolybdate on TiO2/g-C3N4 under mild solvent-free conditions
Source: Royal Society of Chemistry journal article supplement (doi:10.1039/d4nj03766a), 2024-12-04

## Supporting information

### **One-Pot Synthesis of 1,3-oxazine derivatives catalyzed by a green nanocomposite of lacunary phosphomolybdate on TiO<sub>2</sub>/g-C<sub>3</sub>N<sub>4</sub> under mild solvent-free conditions**

Maryam Bahmanziyari, Hossein Naeimi\*

<sup>a</sup> *Department of Organic Chemistry, Faculty of Chemistry, University of Kashan, Kashan, 87317-51167, I.R. Iran; Tel: 98-31-55912388; Fax: 983155912397; E-mail: [Naeimi@kashanu.ac.ir](mailto:Naeimi@kashanu.ac.ir)*

#### **General procedure for the synthesis of 1,3-oxazine derivatives**

In a test tube stirred in an oil bath at a temperature of 80 °C with 1 mmol aromatic aldehydes, 1 mmol 2-naphthol, and 1.2 mmol urea, 3 mg nanocomposite H<sub>3</sub>PMO<sub>11</sub>O<sub>39</sub>@TiO<sub>2</sub>@g-C<sub>3</sub>N<sub>4</sub> was used. The progress of the reaction was monitored through thin layer chromatography (Ethyl acetate/n-hexane, 1/3). In order to separate the catalyst from the mixture, the mixture was cooled before adding ethanol 25 mL, centrifuged, and then filtered. With the help of recrystallization, the pure product was prepared to evaluate the melting point, FT-IR and <sup>1</sup>H NMR.

### The spectral data:

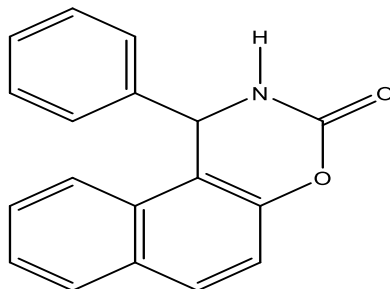

1-(phenyl)-1H-naphtho[1,2-e][1,3]oxazin-3(2H)-one (**4a**); White solid; m.p.: 220-225 °C; IR (KBr)  $\nu = 3410, 3107, 2963, 2872, 1619, 1568, 1375, 1227/\text{cm}^{-1}$ ;  $^1\text{H NMR}$  (400 MHz,  $\text{DMSO-}d_6$ )  $\delta$  7.05 (s, 1H), 7.15 (d,  $J=8.0$  Hz, 3H), 7.22-7.32 (m, 4H), 7.53 (d,  $J=8.0$  Hz, 1H), 7.78 (d,  $J=8.0$  Hz, 2H), 8.05 (d,  $J=12.0$  Hz, 1H), 8.99 (s, 1H).

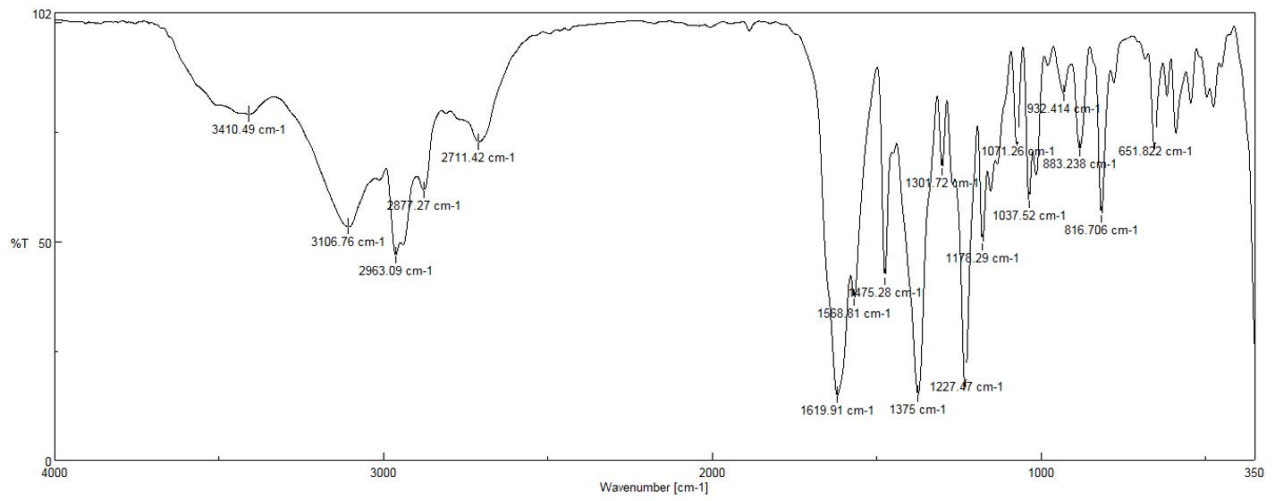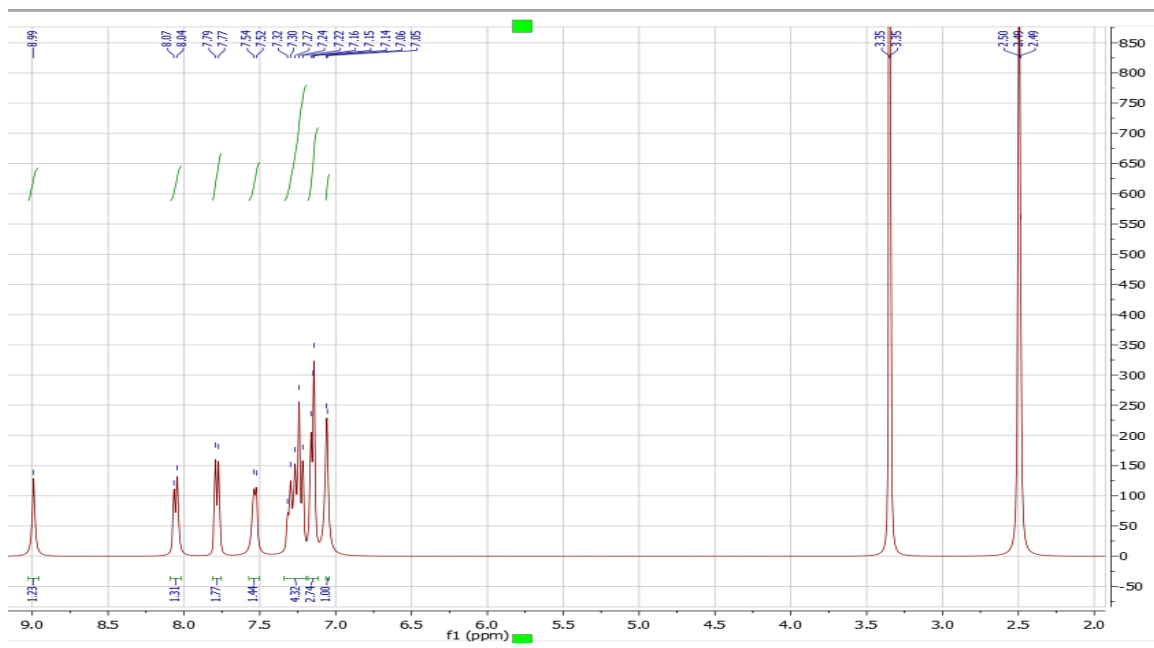

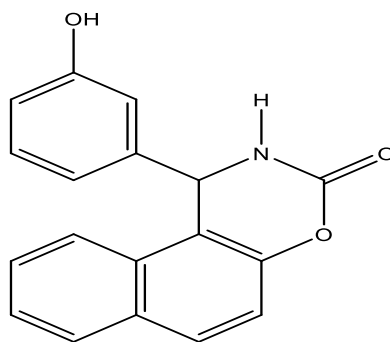

1-(3-hydroxyphenyl)-1H-naphtho[1,2-e][1,3]oxazin-3(2H)-one (**4b**); White solid; m.p.: 188-200 °C; IR (KBr)  $\nu = 3434, 3314, 2957, 1665, 1625, 1359, 1199 \text{ /cm}^{-1}$ ;  $^1\text{H NMR}$  (400 MHz,  $\text{DMSO-}d_6$ )  $\delta$  5.83 (s, 1H), 6.52 (d,  $J=8.0 \text{ Hz}$ , 2H), 6.59 (d,  $J=8.0 \text{ Hz}$ , 2H), 6.86 (s, 1H), 7.02 (t,  $J=12.0 \text{ Hz}$ , 1H), 7.20 (d,  $J=8.0 \text{ Hz}$ , 1H), 7.28 (t,  $J=16.0 \text{ Hz}$ , 1H), 7.40 (s, 1H), 7.74 (d,  $J=12.0 \text{ Hz}$ , 1H), 7.81 (d,  $J=8.0 \text{ Hz}$ , 1H), 9.17 (s, 1H), 9.83 (s, 1H).

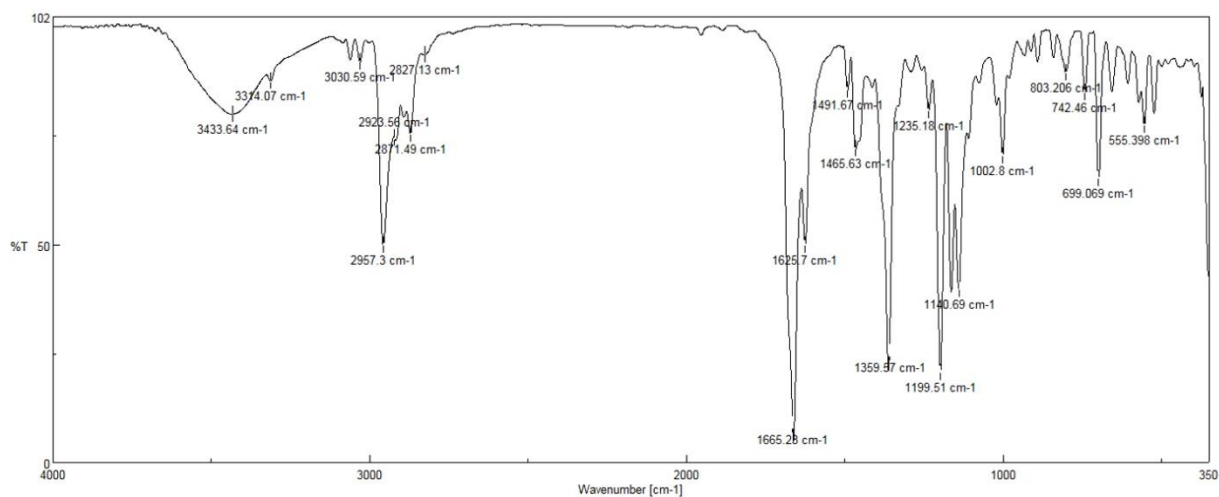

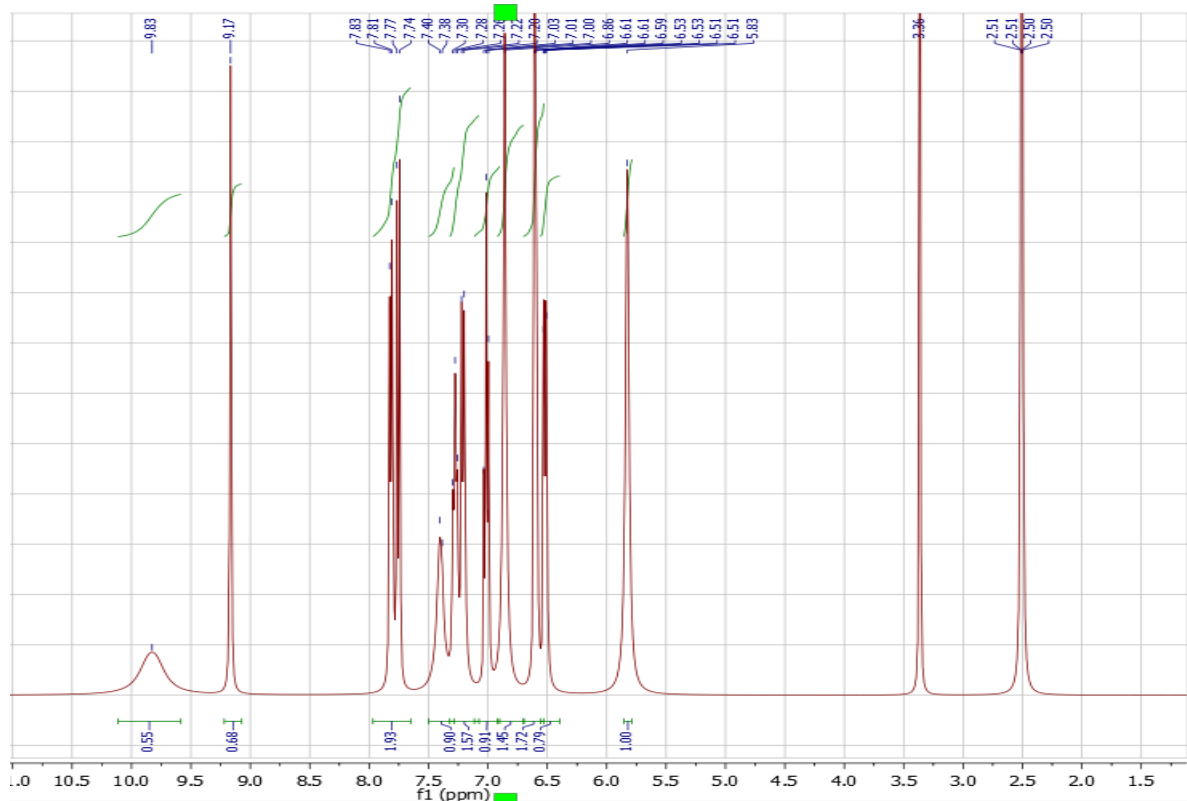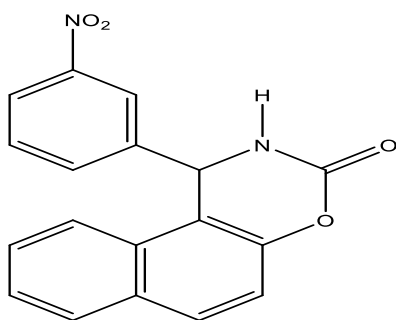

1-(3-nitrophenyl)-1H-naphtho[1,2-e][1,3]oxazin-3(2H)-one (**4c**); Yellow solid; m.p.: 224-228°C; IR (KBr)  $\nu = 3447, 3347, 1644, 1602, 1535, 1466, 1356 \text{ /cm}^{-1}$ ;  $^1\text{H NMR}$  (400 MHz,  $\text{DMSO-d}_6$ )  $\delta$  5.96 (s, 1H), 6.97-7.06 (m, 2H), 7.21 (d,  $J = 8.0 \text{ Hz}$ , 1H), 7.32 (t,  $J = 16.0 \text{ Hz}$ , 1H), 7.47-7.56 (m, 2H), 8.09 (s, 1H), 10.13 (s, 1H).

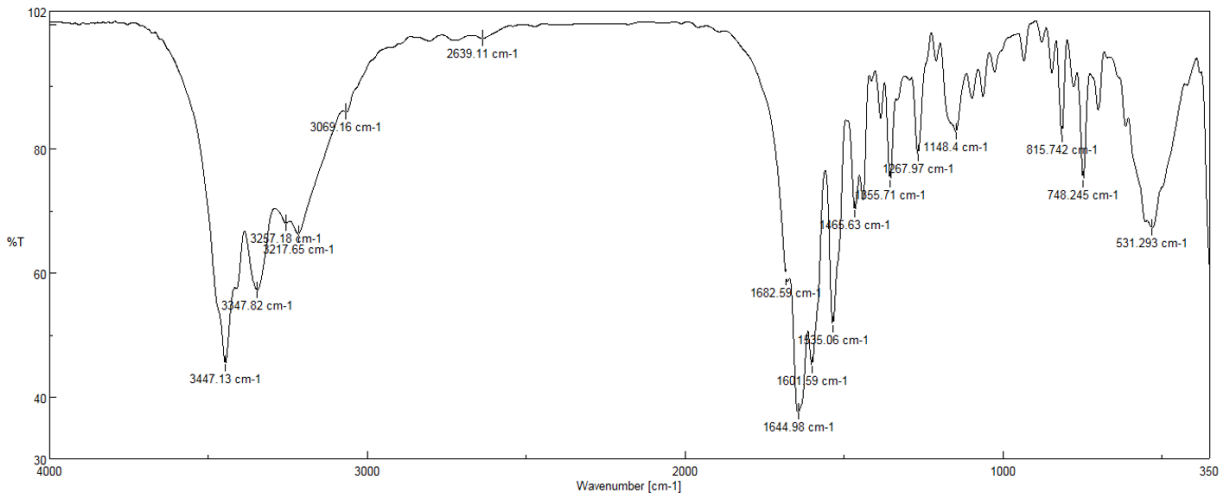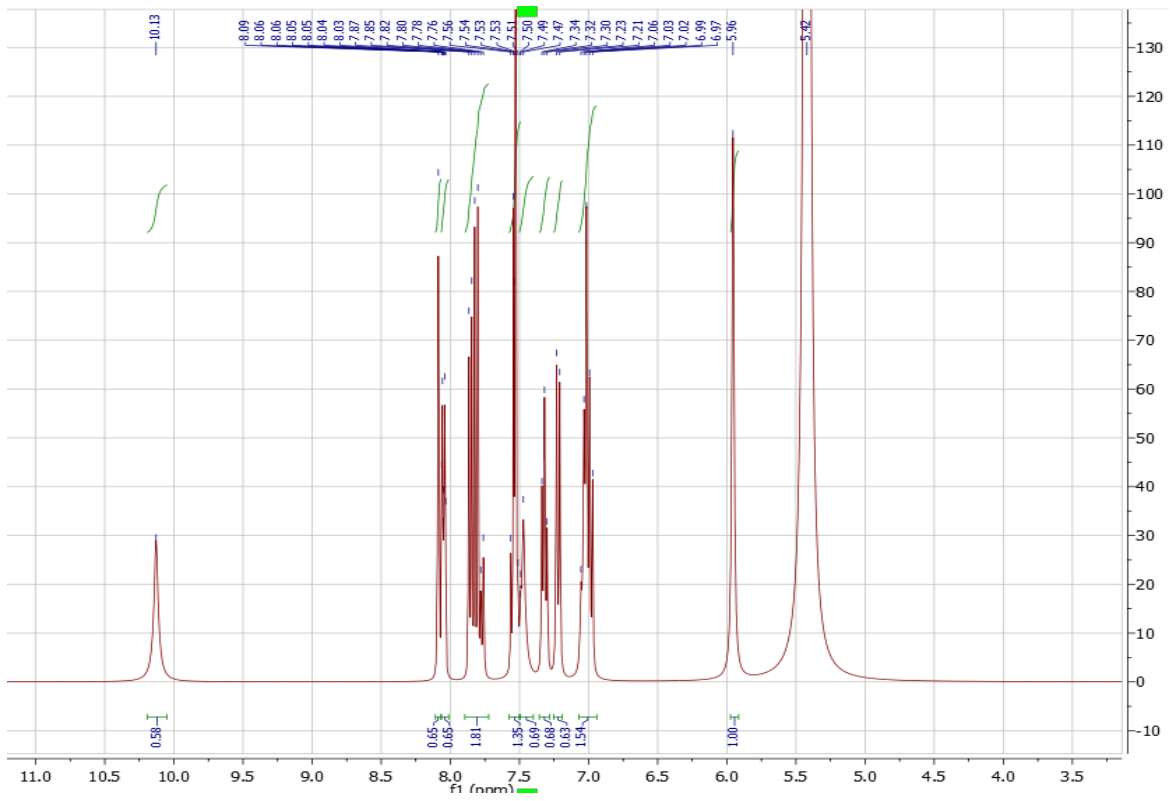

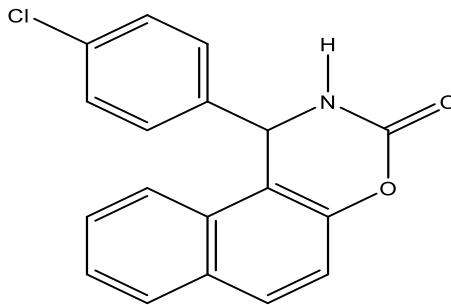

1-(4-chlorophenyl)-1H-naphtho[1,2-e] [1,3] oxazin-3(2H)-one (**4d**); White solid; m.p.: 210-215°C; IR (KBr)  $\nu = 3444, 3344, 3257, 1675, 1599, 1465, 1154 \text{ /cm}^{-1}$ ;  $^1\text{H NMR}$  (400 MHz, DMSO- $d_6$ )  $\delta$  (ppm) ; 5.83 (s, 1H), 6.54 (d,  $J = 8.0 \text{ Hz}$ , 3H), 6.80 (t,  $J = 20.0 \text{ Hz}$ , 4H), 8.14 (s, 1H), 8.42 (d,  $J = 12.0 \text{ Hz}$ , 2H), 9.94 (s, 1H).

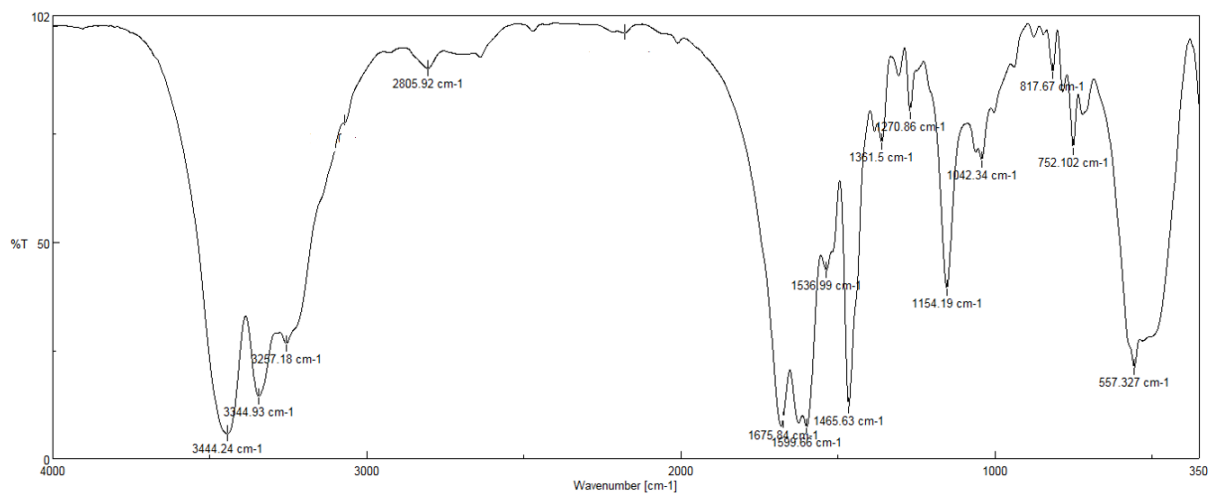

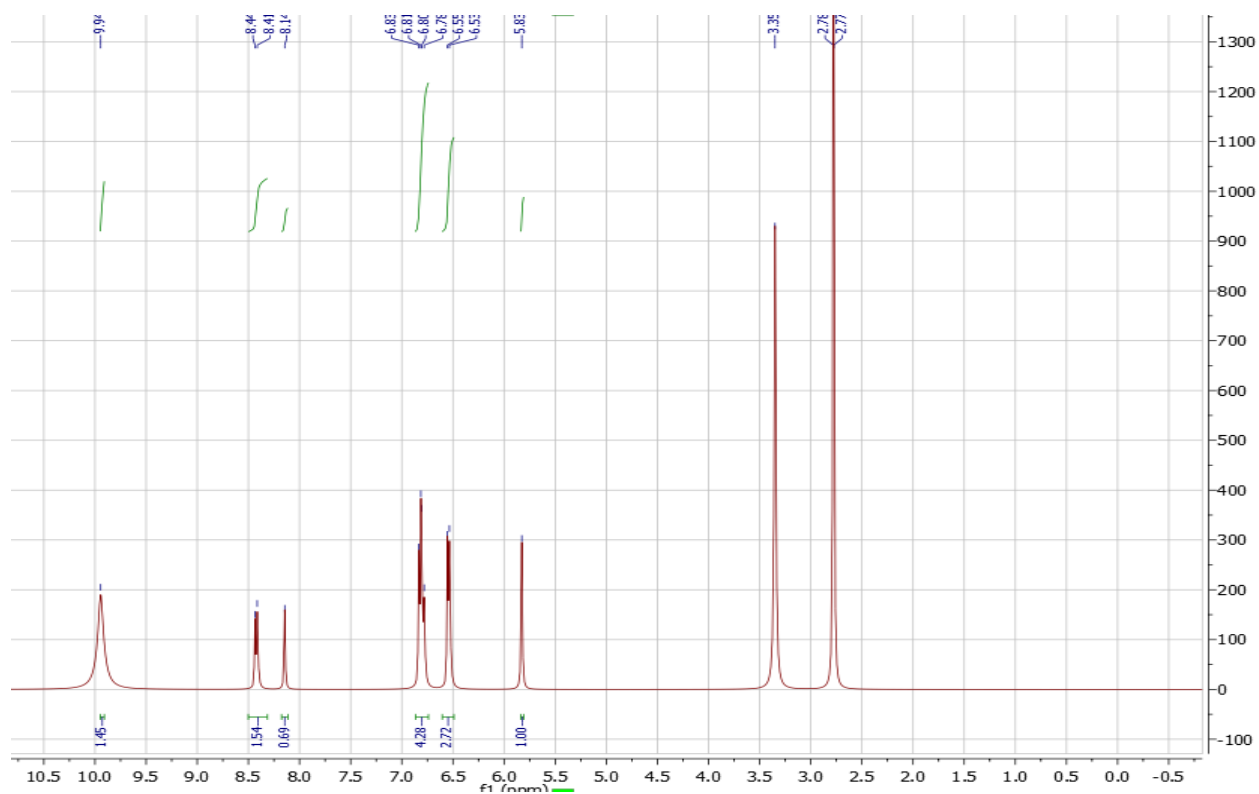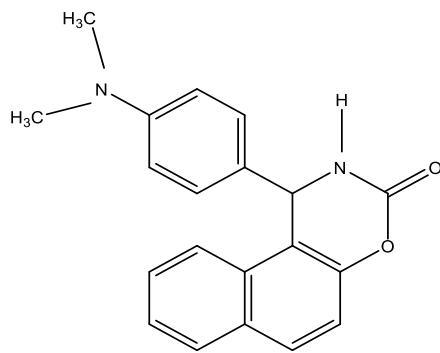

1-(*N,N*-dimethylphenyl)-1H-naphtho[1,2-*e*][1,3]oxazin-3(2H)-one (**4e**); White solid; m.p.: 220-228 °C; IR (KBr)  $\nu = 3443, 3388, 3253, 1681, 1629, 1541, 1466, 1269, 557 \text{ /cm}^{-1}$ ;  $^1\text{H NMR}$  (400 MHz,  $\text{DMSO-}d_6$ )  $\delta(\text{ppm})$ ; 2.82 (s, 6H), 6.04 (d,  $J=4.0 \text{ Hz}$ , 1H), 6.29 (d,  $J=12.0 \text{ Hz}$ , 2H), 7.08 (d,  $J=8.0 \text{ Hz}$ , 2H), 7.35 (d,  $J=8.0 \text{ Hz}$ , 1H), 7.42-7.50 (m, 2H), 7.79 (d,  $J=8.0 \text{ Hz}$ , 1H), 7.94 (t,  $J=16.0 \text{ Hz}$ , 2H), 8.72 (s, 1H).



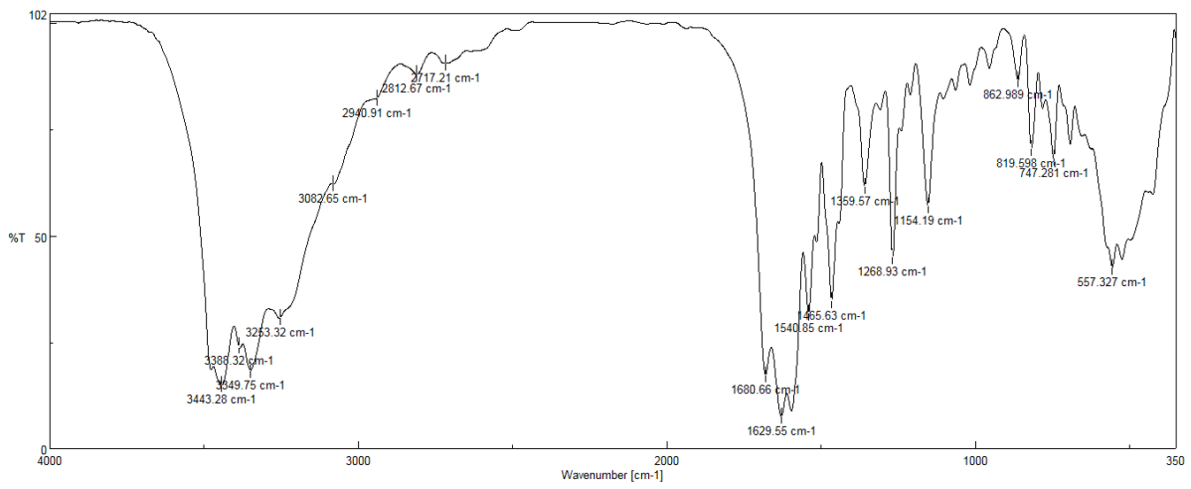

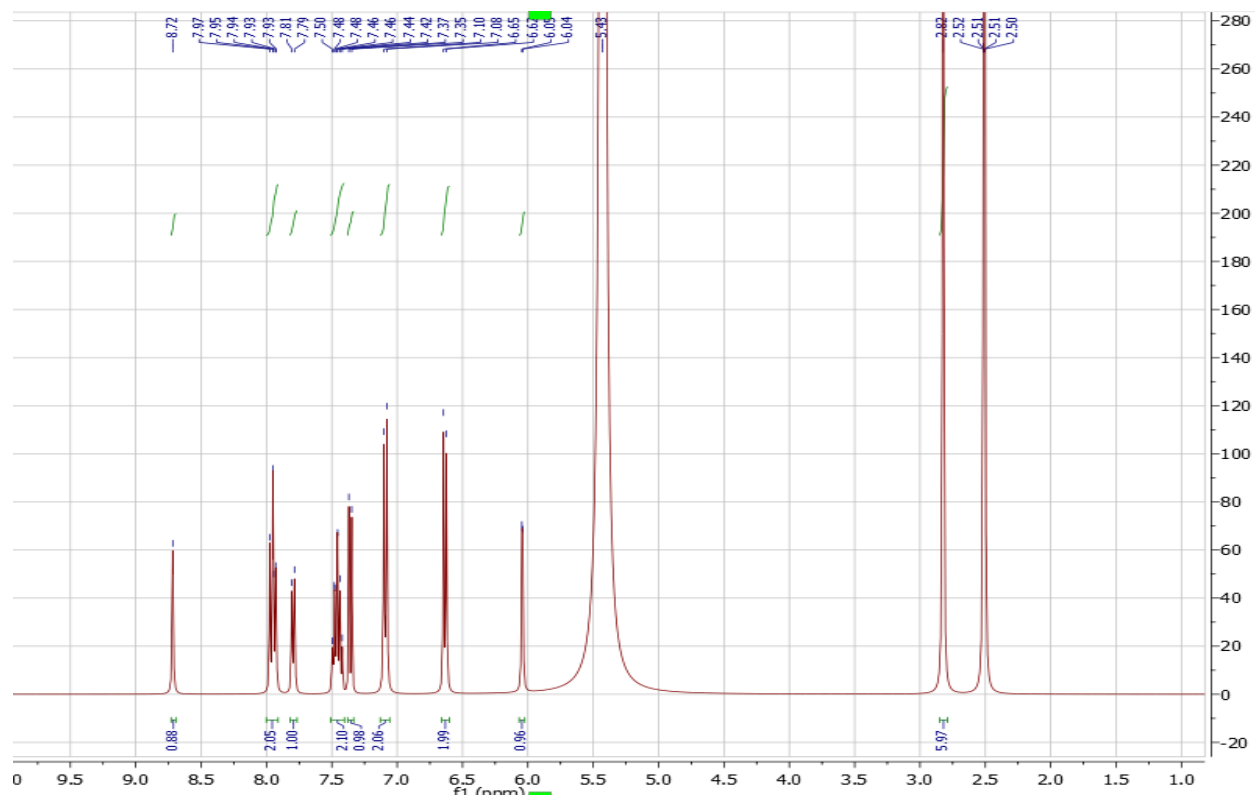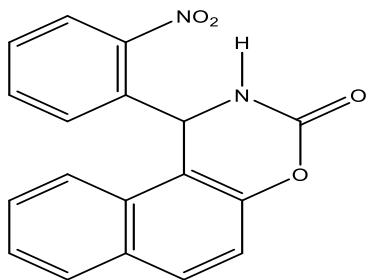

1-(2-nitrophenyl)-1H-naphtho[1,2-e][1,3]oxazin-3(2H)-one (**4f**); White solid; m.p.: 103-108 °C; IR (KBr)  $\nu = 3481, 3442, 3307, 1673, 1597, 1524, 1368, 1154, 511 \text{ /cm}^{-1}$ ;  $^1\text{H NMR}$  (400 MHz, DMSO- $d_6$ )  $\delta(\text{ppm})$ ; 5.78 (s, 1H), 6.55 (t,  $J=16.0 \text{ Hz}$ , 1H), 6.78 (d,  $J=8.0 \text{ Hz}$ , 1H), 6.86 (d,  $J=8.0 \text{ Hz}$ , 1H), 7.01 (d,  $J=8.0 \text{ Hz}$ , 2H), 7.29 (d,  $J=8.0 \text{ Hz}$ , 2H), 7.42-7.55 (m, 2H), 7.58 (d,  $J=8.0 \text{ Hz}$ , 1H), 7.96 (d,  $J=8.0 \text{ Hz}$ , 1H), 9.74 (s, 1H).

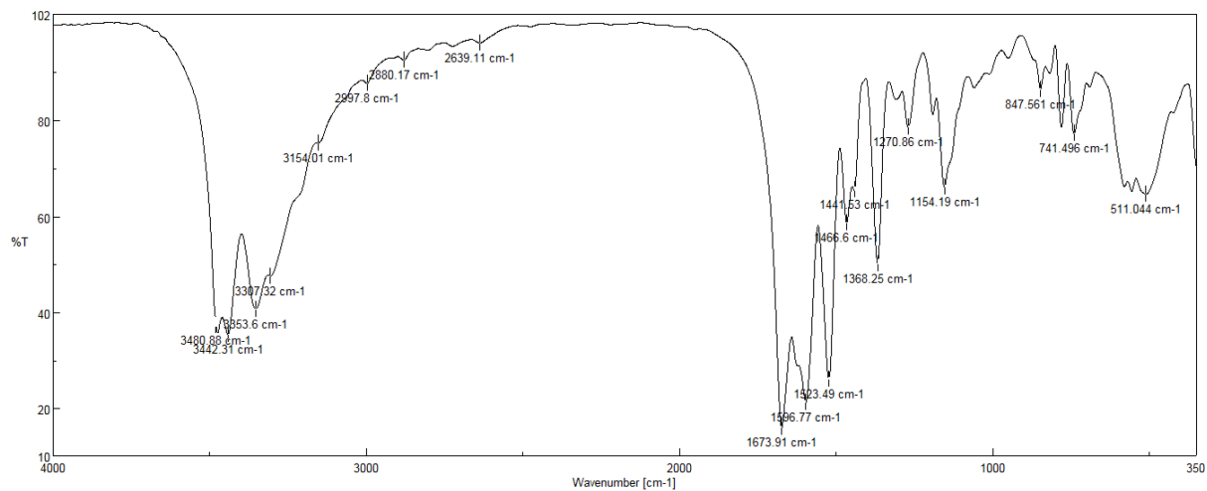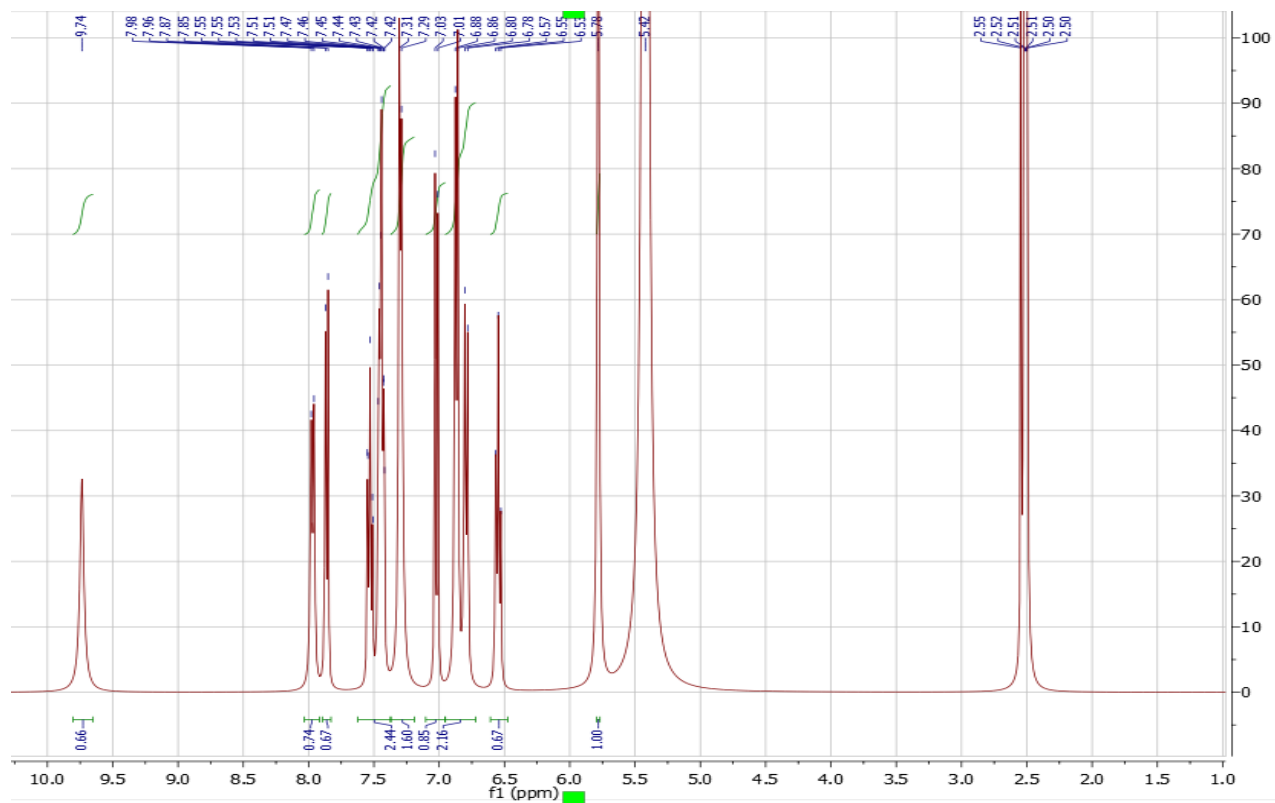

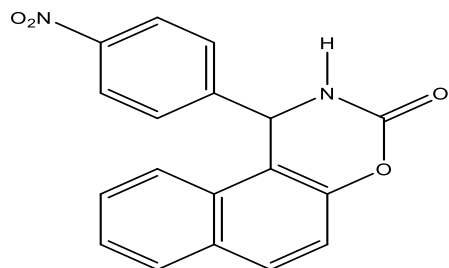

1-(4-nitrophenyl)-1H-naphtho[1,2-e][1,3]oxazin-3(2H)-one (**4g**); Yellow solid; m.p.: 187-190 °C; IR (KBr)  $\nu = 3444, 3348, 3257, 1655, 1600, 1466, 1346, 556 \text{ /cm}^{-1}$ ;  $^1\text{H NMR}$  (400 MHz, DMSO- $d_6$ )  $\delta(\text{ppm})$  ; 5.94 (s, 1H), 7.00 (s, 2H), 7.22 (d,  $J = 8.0 \text{ Hz}$ , 1H), 7.31 (t,  $J = 16.0 \text{ Hz}$ , 1H), 7.41 (d,  $J = 8.0 \text{ Hz}$ , 2H), 7.80-7.86 (m, 2H), 8.15 (d,  $J = 8.0 \text{ Hz}$ , 2H), 10.05 (s, 1H).

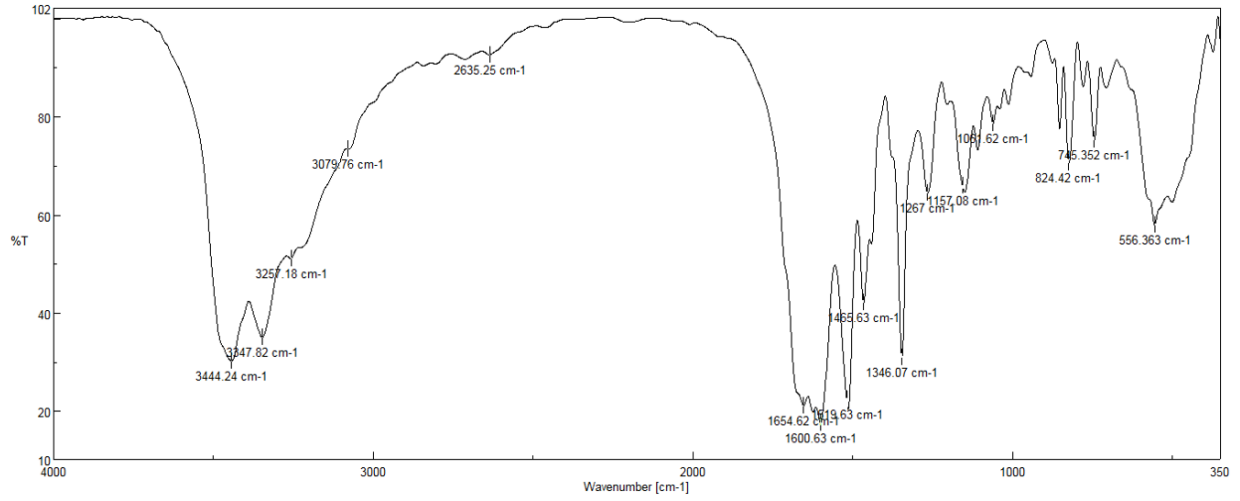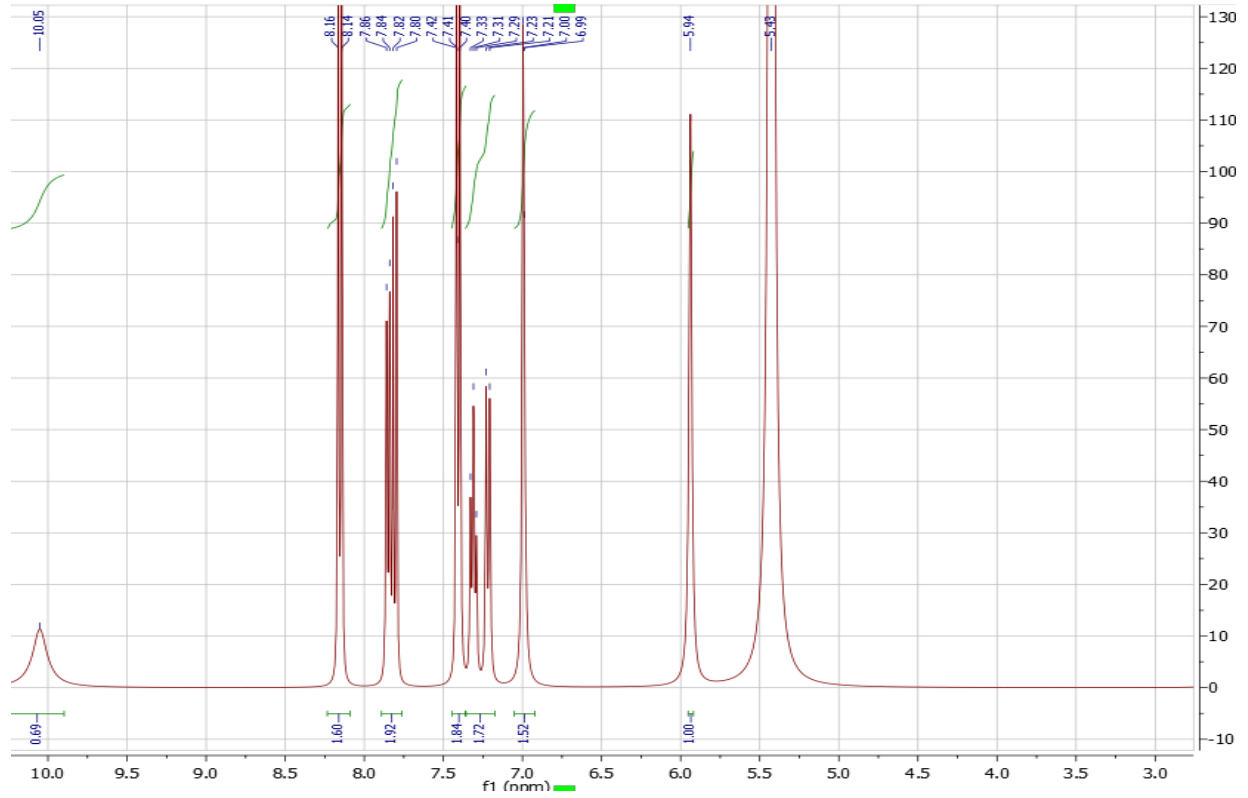

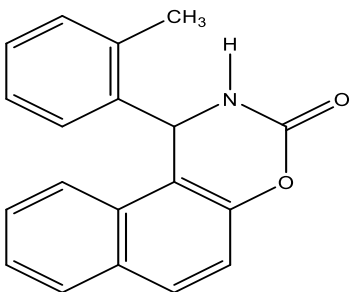

1-(2-methylphenyl)-1H-naphtho[1,2-e][1,3]oxazin-3(2H)-one (**4h**); White solid; m.p.: 225-230 °C; IR (KBr)  $\nu = 3444.2, 3347.8, 3225.3, 1686.4, 1593.8, 1465.6, 1158, 536.1$  /cm<sup>-1</sup>; <sup>1</sup>H NMR (400 MHz, DMSO-*d*<sub>6</sub>)  $\delta$ (ppm) ; 2.22 (s, 3H), 5.83 (s, 1H), 6.06 (d, *j*=8Hz, 3H), 6.97 (t, *j*=16Hz, 1H), 7.14 (d, *j*=8Hz, 3H), 7.27 (t, *j*=16Hz, 2H), 9.94 (s, 1H).

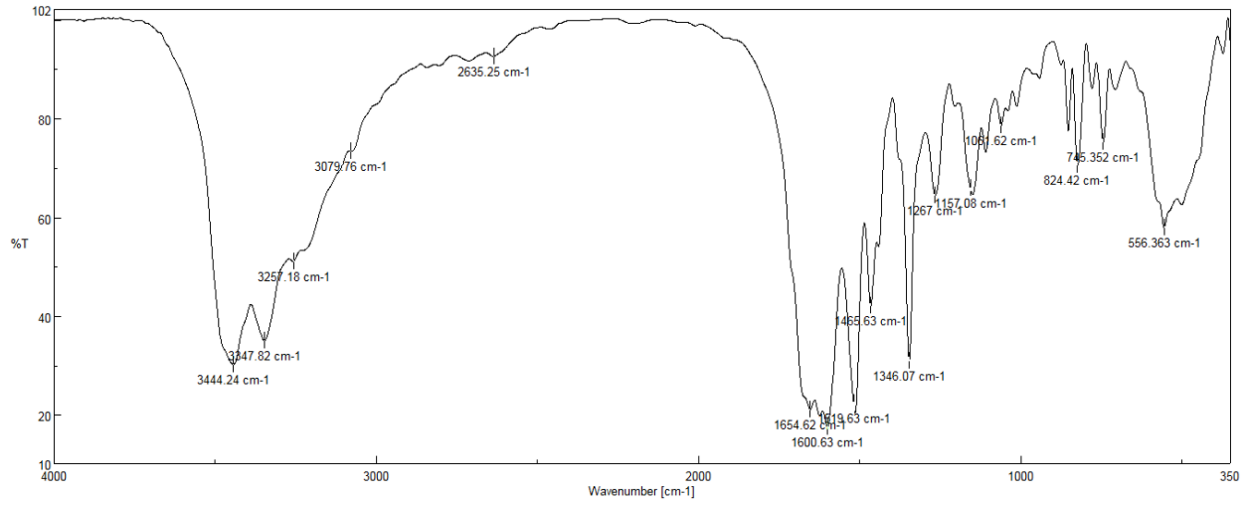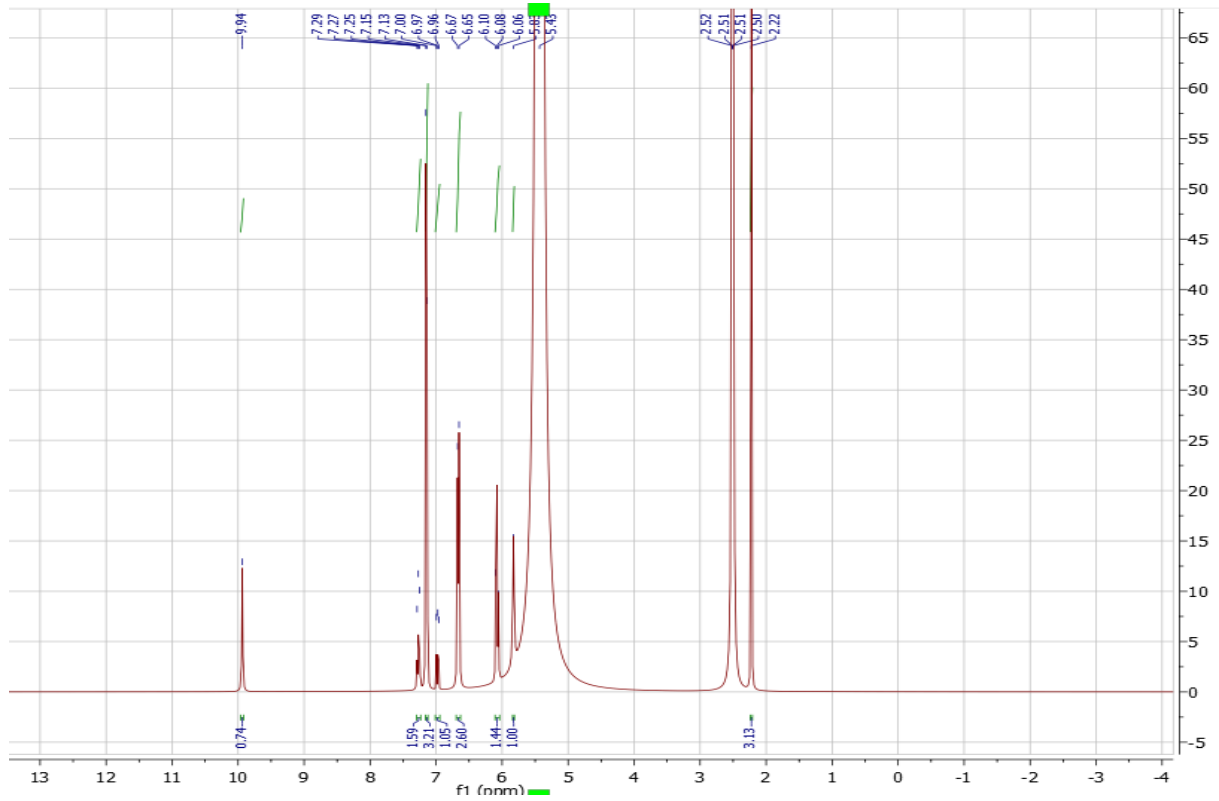

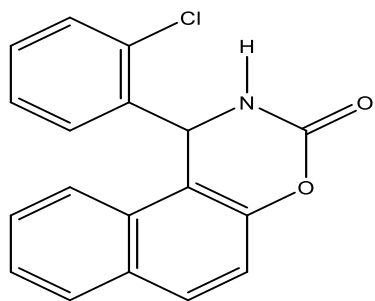

1-(2-chlorophenyl)-1H-naphtho[1,2-e][1,3]oxazin-3(2H)-one (**4i**); White solid; m.p.: (1-250 -255°C; IR (KBr)  $\nu = 3444, 3345, 3257, 1654, 1600, 1464, 1157, 557 \text{ /cm}^{-1}$ ;  $^1\text{H NMR}$  (400 MHz, DMSO- $d_6$ )  $\delta$ (ppm) ; 5.73 (s, 1H), 6.86 (q, 2H), 7.09 (d,  $J=8.0 \text{ Hz}$ , 1H), 7.21-7.35 (m, 3H), 7.41 (t,  $J=16.0 \text{ Hz}$ , 1H), 7.71 (d,  $J=8.0 \text{ Hz}$ , 1H), 7.78 (d,  $J=8.0 \text{ Hz}$ , 1H), 8.06 (d,  $J=8.0 \text{ Hz}$ , 1H), 9.82 (s, 1H).



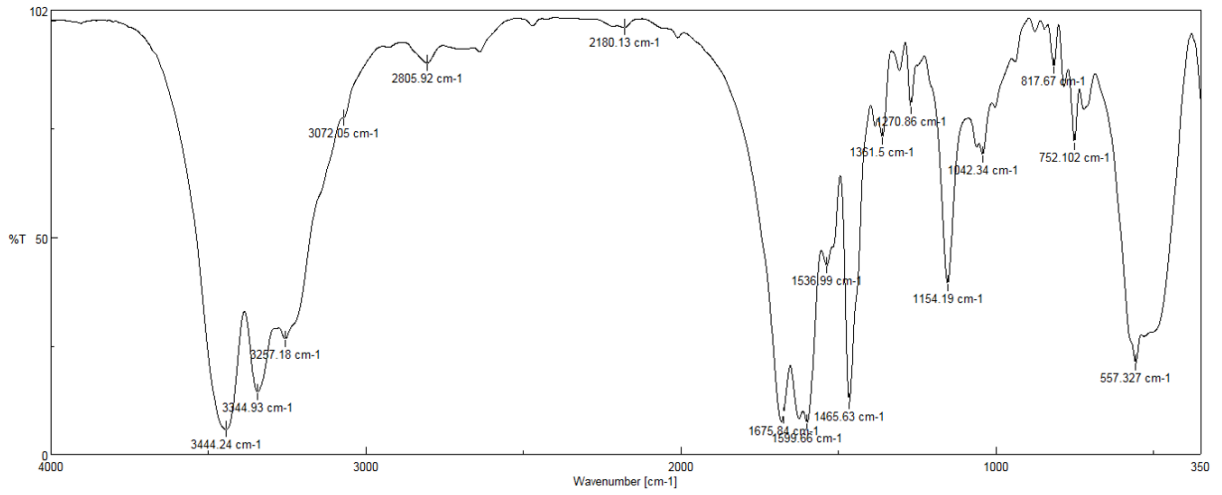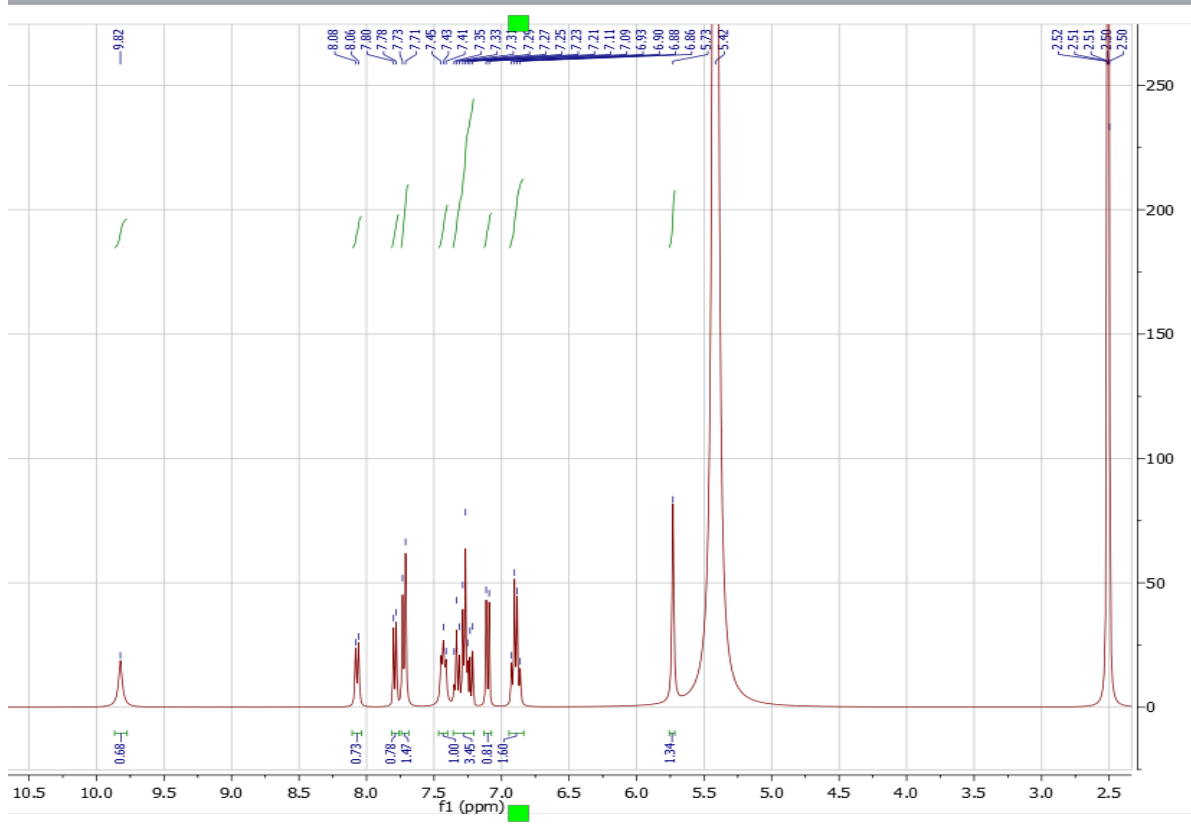

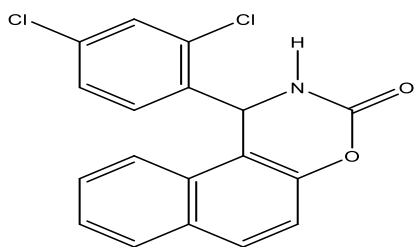

1-(2,4-dichlorophenyl)-1H-naphtho[1,2-e] [1, 3] oxazin-3(2H)-one (**4j**); White solid; m.p.: 258-260 °C; IR (KBr)  $\nu = 3447, 3347, 3257, 1644, 1535, 1466, 1148 / \text{cm}^{-1}$ ;  $^1\text{H}$  NMR (400 MHz,  $\text{DMSO-}d_6$ )  $\delta(\text{ppm})$ ; 5.89 (s, 1H), 6.89 (s, 1H), 7.13-7.41 (m, 6H), 7.74 (q, 2H), 10.05 (s, 1H).

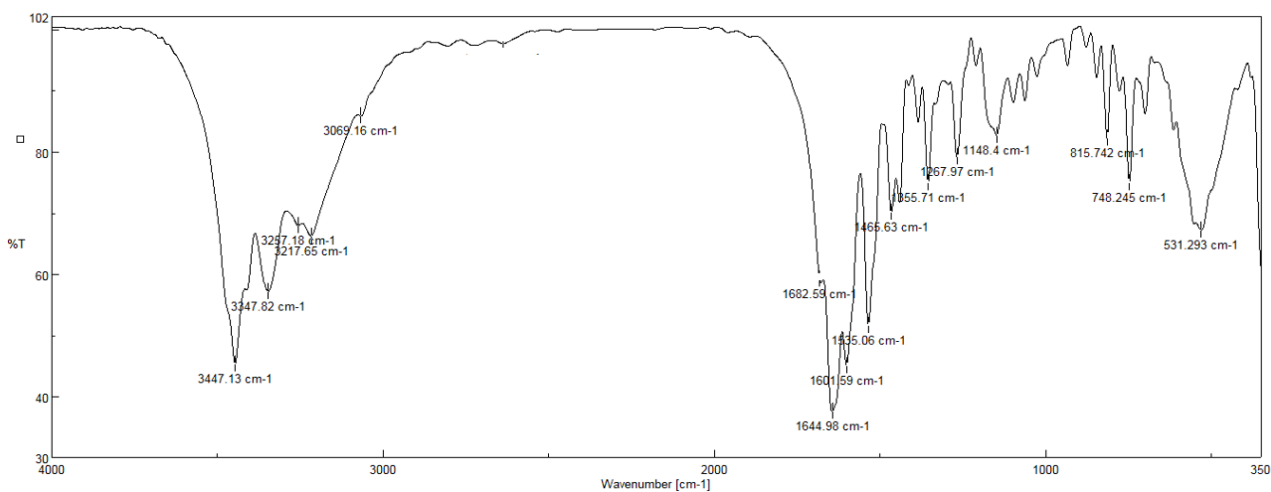

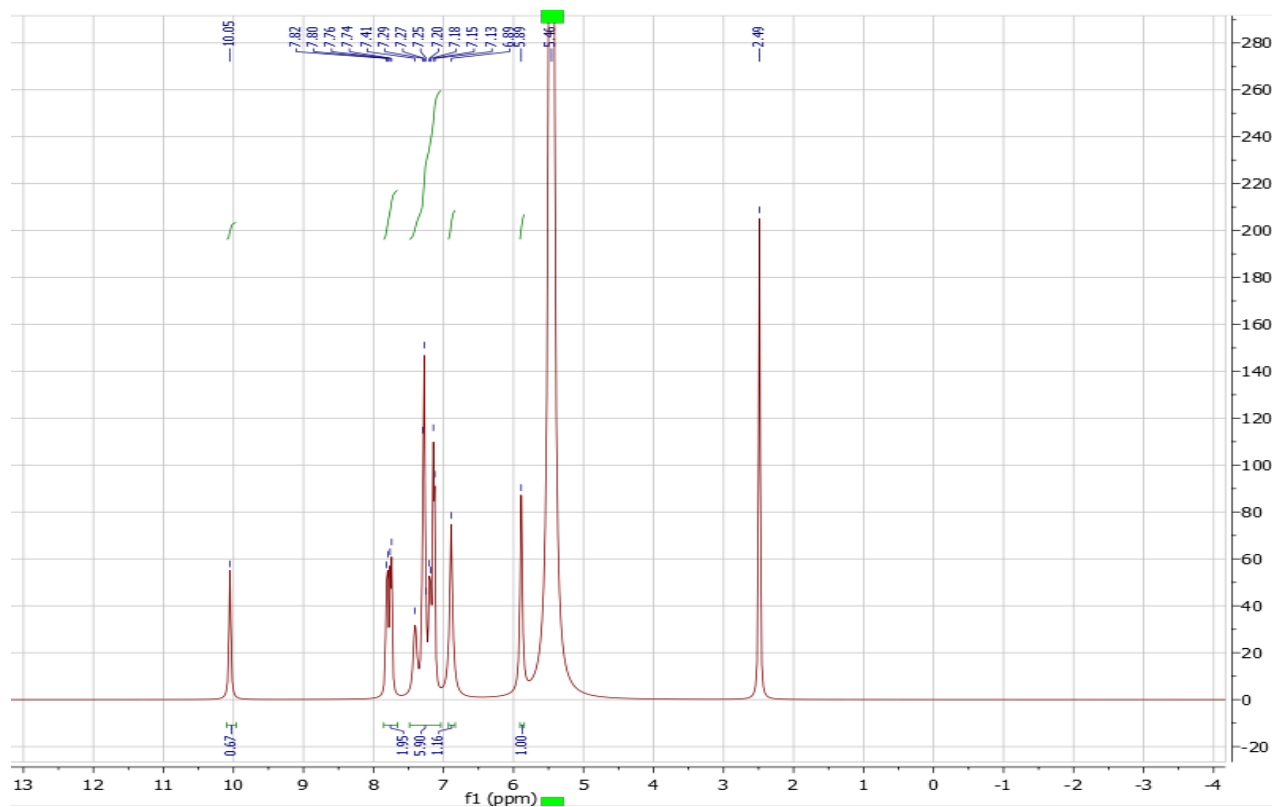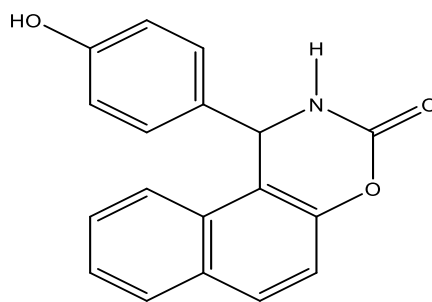

1-(4-hydroxyphenyl)-1H-naphtho[1,2-e][1,3]oxazin-3(2H)-one(**4k**); White solid; m.p.: 180-184 °C; IR (KBr)  $\nu = 3442, 3347, 3289, 1680, 1599, 1466, 1153, 557 \text{ /cm}^{-1}$ ;  $^1\text{H NMR}$  (400 MHz,  $\text{DMSO-}d_6$ )  $\delta(\text{ppm})$  ; 5.79 (s, 1H), 6.61 (d,  $J=8.0 \text{ Hz}$ , 2H), 6.83 (d,  $J=8.0 \text{ Hz}$ , 2H), 6.96 (d,  $J=8.0 \text{ Hz}$ , 1H), 7.19 (d,  $J=8.0 \text{ Hz}$ , 1H), 7.27 (t,  $J=16.0 \text{ Hz}$ , 1H), 7.73 (d,  $J=8.0 \text{ Hz}$ , 1H), 7.80 (d,  $J=8.0 \text{ Hz}$ , 1H), 9.14 (s, 1H), 9.91 (s, 1H).

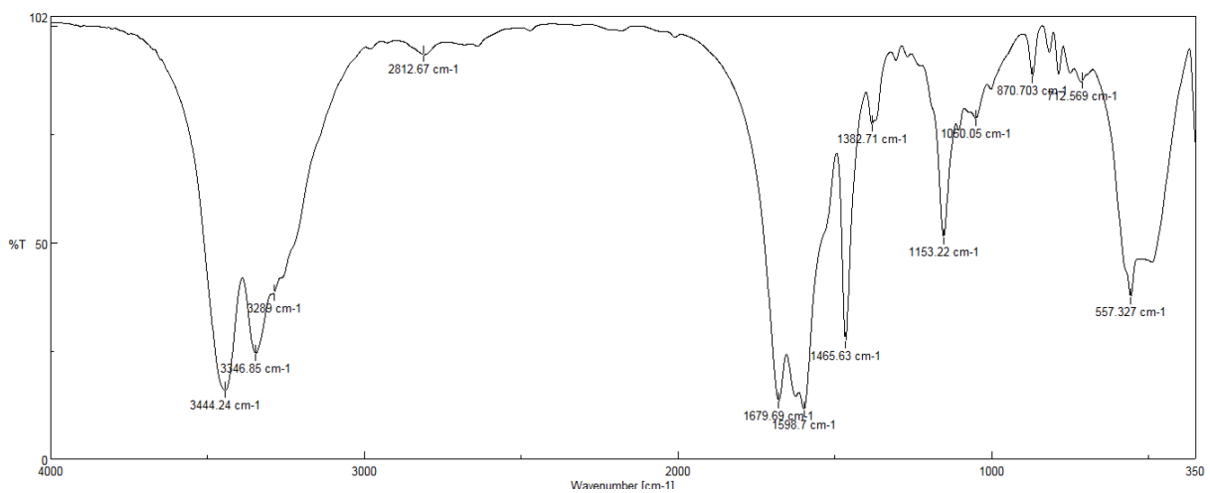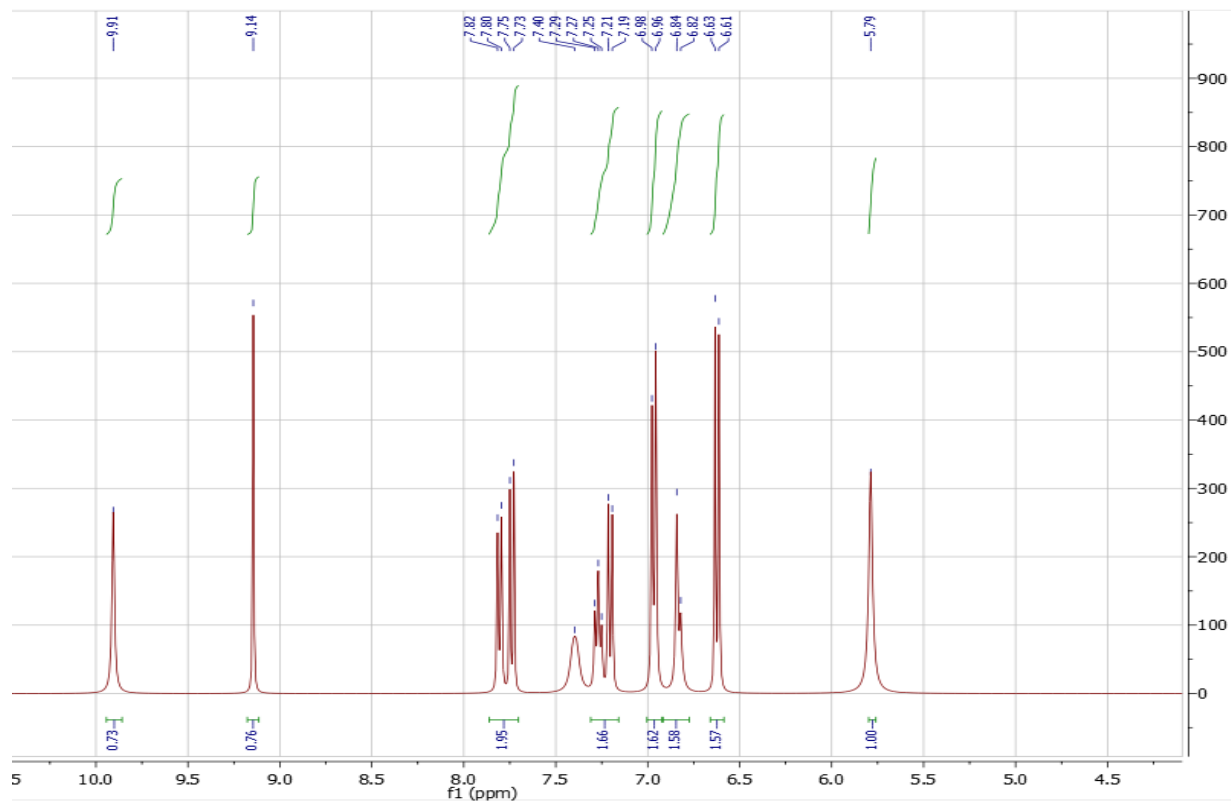

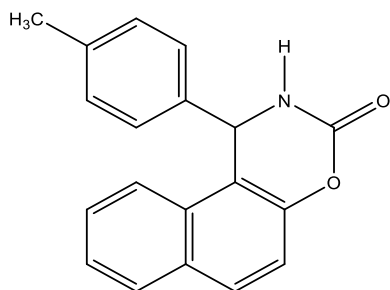

1-(4-methylphenyl)-1H-naphtho[1,2-e][1,3]oxazin-3(2H)-one (**41**); White solid; m.p.: 165-168 °C; IR (KBr)  $\nu = 3463, 3352, 3207, 1629, 1583, 1507, 1357, 1233 \text{ /cm}^{-1}$ ;  $^1\text{H NMR}$  (400 MHz, DMSO- $d_6$ )  $\delta$ (ppm) ; 2.28 (s, 3H), 5.83 (s, 1H), 6.65 (d,  $J=8.0 \text{ Hz}$ , 2H), 7.20 (q, 5H), 7.76 (d,  $J=12.0 \text{ Hz}$ , 1H), 7.80 (d,  $J=8.0 \text{ Hz}$ , 1H), 9.94 (s, 1H).

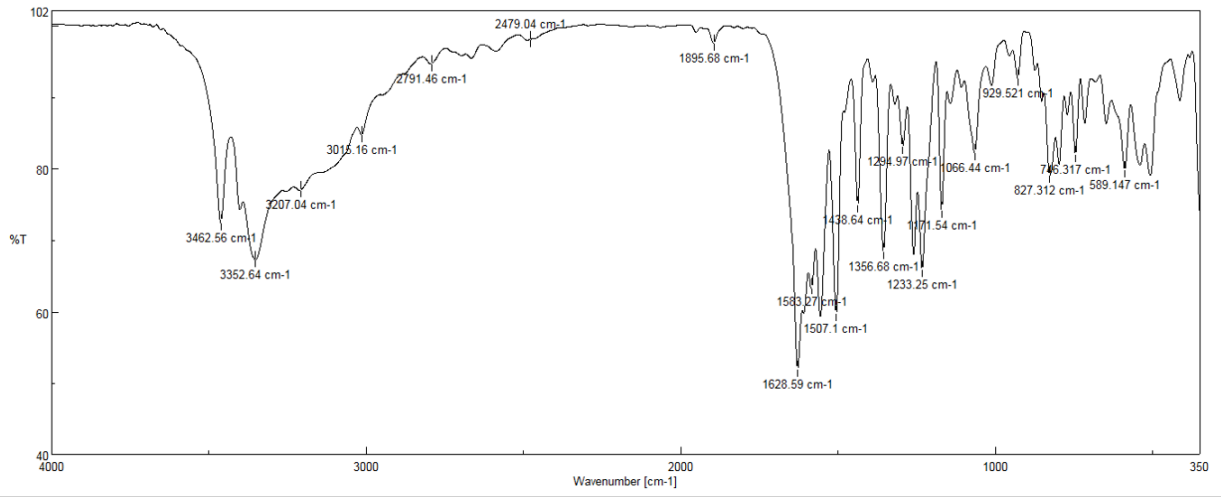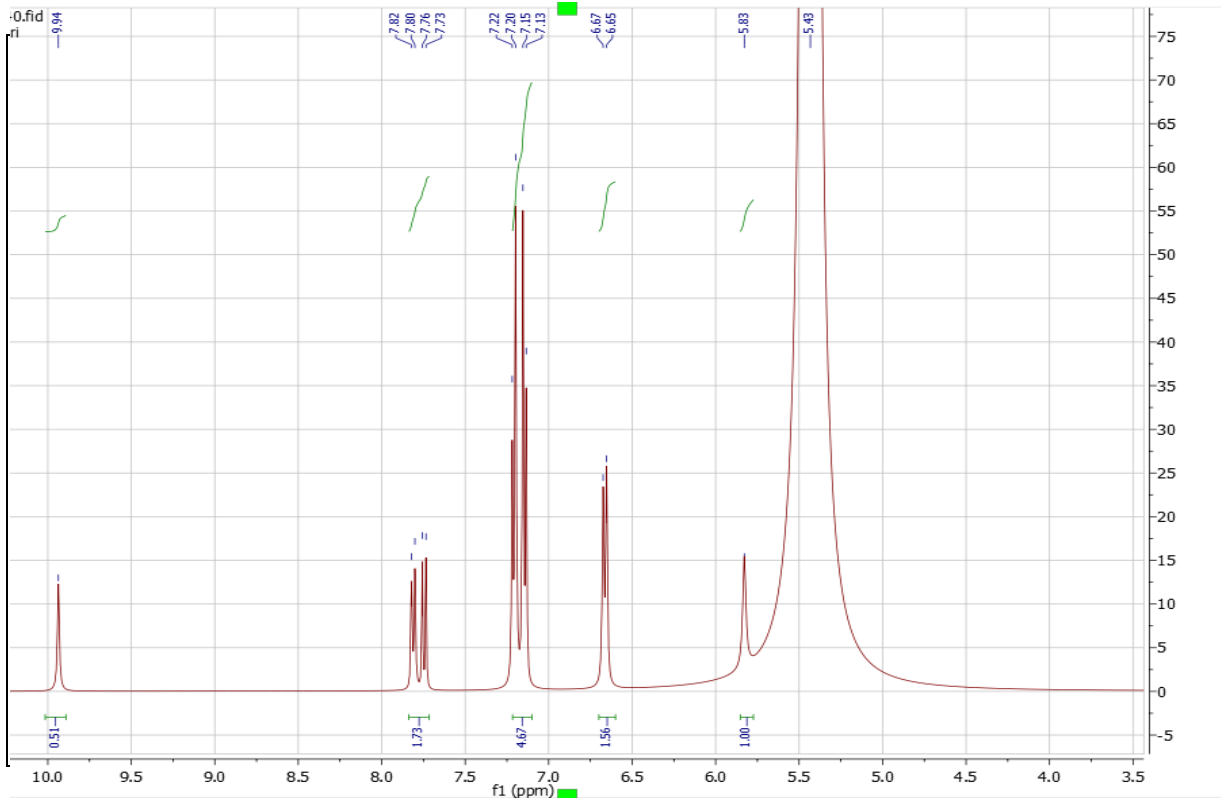

Supplement: d4nj03766a1.pdf [file d4nj03766a1.pdf]
